# Supplementary material for: A blood-based miRNA signature for early non-invasive diagnosis of preeclampsia
Source: PubMed Central journal article supplement (PMC9469544; doi:10.1186/s12916-022-02495-x), 2022-09-13
Supplement: 12916_2022_2495_MOESM1_ESM.pdf [file 12916_2022_2495_MOESM1_ESM.pdf]

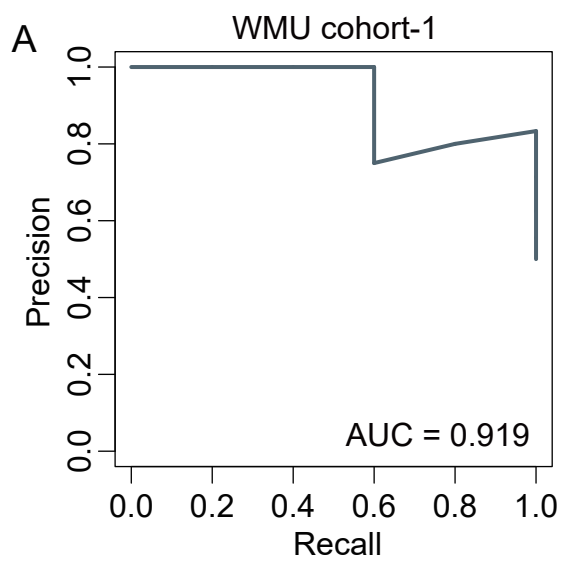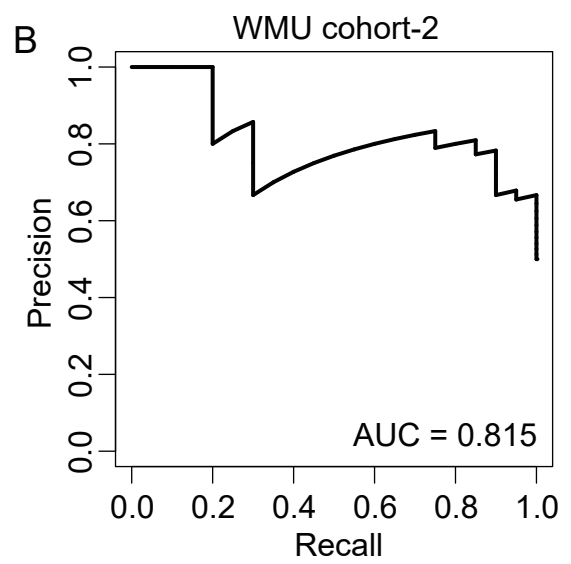

Fig.S1. Precision-Recall curve for the performance of the miR2PE-score in the WMU cohort-1 (A) and WMU cohort-2 (B).

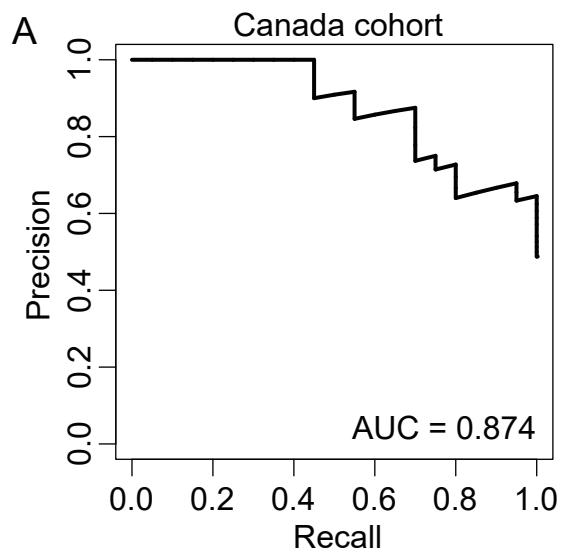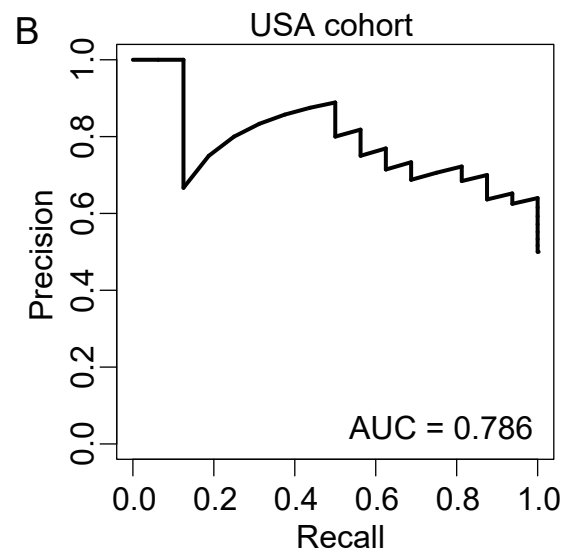

Fig.S2. Precision-Recall curve for the performance of the miR2PE-score in the Canada cohort (A) and USA cohort (B).

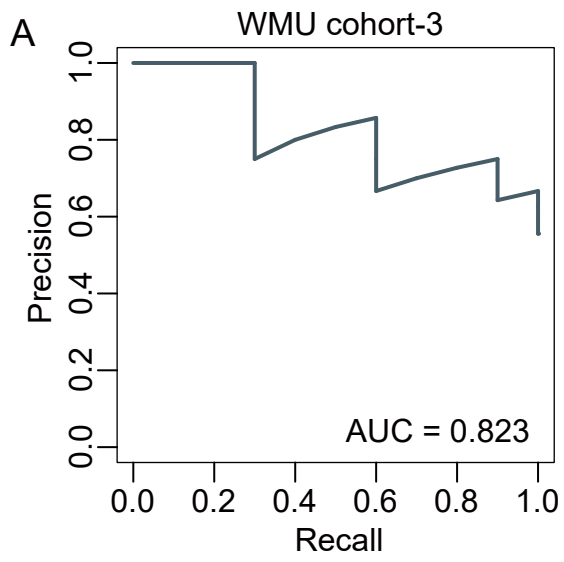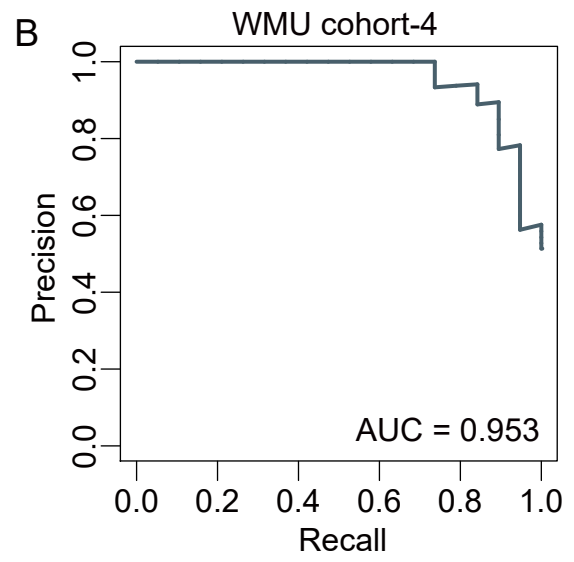

Fig.S3. Precision-Recall curve for the performance of the miR2PE-score in the WMU cohort-3 (A) and WMU cohort-4 (B).

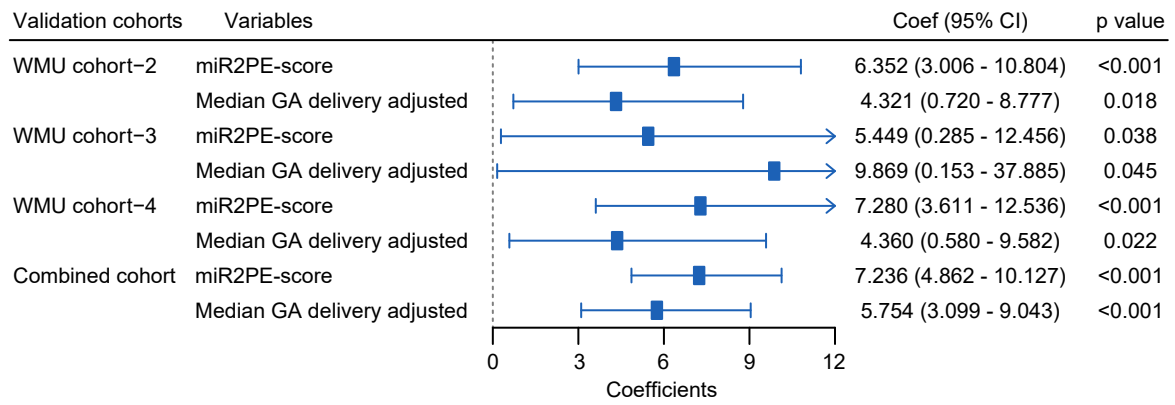

**Fig.S4.** Forest plots of adjusted regression coefficients by gestational ages.

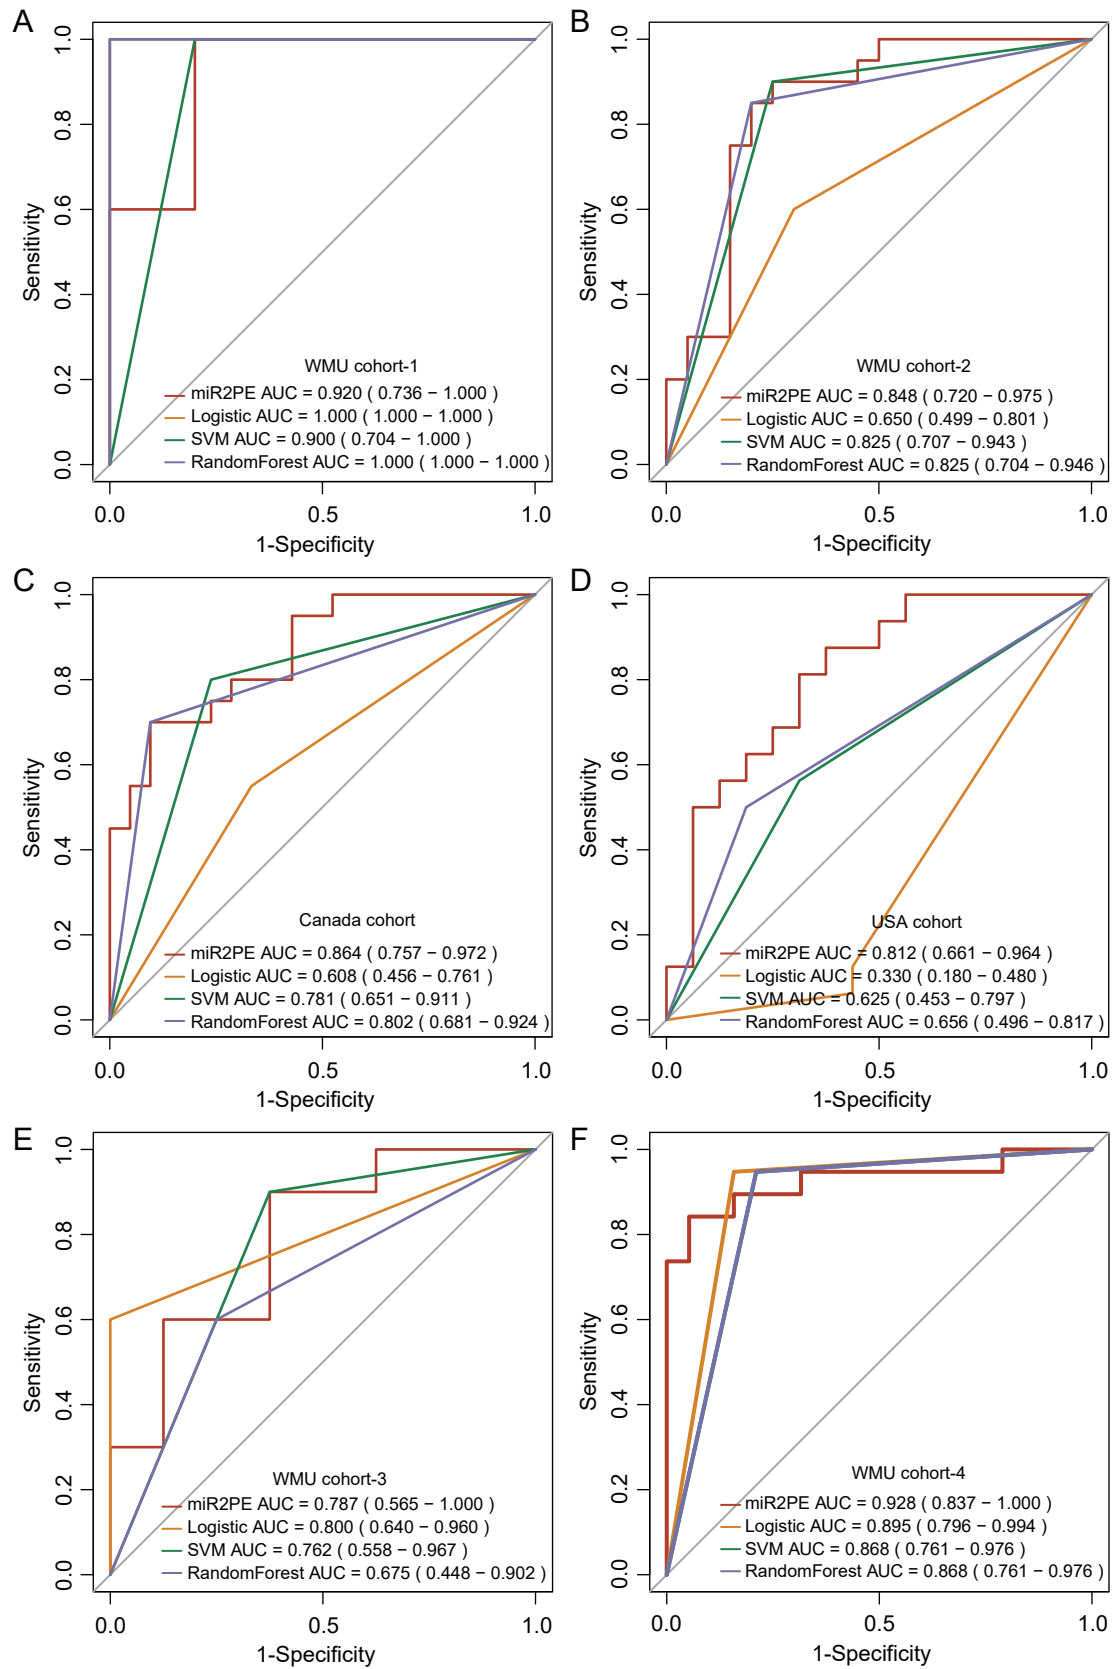

Fig.S5. Performance comparison of the miR2PE-score with other parallel methods to detect PE.
